# Supplementary material
Source: HighWire-hosted journal article supplement (https://erj.ersjournals.com/content/60/5/2102583)

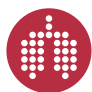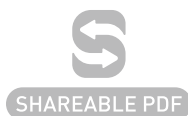

# Asthma remission: what is it and how can it be achieved?

Dennis Thomas <sup>1</sup>, Vanessa M. McDonald <sup>1,2</sup>, Ian D. Pavord <sup>3</sup> and Peter G. Gibson <sup>1,2</sup>

<sup>1</sup>Priority Research Centre for Healthy Lungs, College of Health, Medicine and Wellbeing, University of Newcastle, Hunter Medical Research Institute, Newcastle, Australia. <sup>2</sup>Dept of Respiratory and Sleep Medicine, John Hunter Hospital, Newcastle, Australia. <sup>3</sup>Oxford Respiratory NIHR Biomedical Research Centre, Nuffield Dept of Medicine, University of Oxford, Oxford, UK.

Corresponding author: Peter G. Gibson ([peter.gibson@newcastle.edu.au](mailto:peter.gibson@newcastle.edu.au))

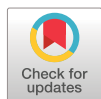

Shareable abstract (@ERSpublications)

**As we are moving through a new era of highly effective targeted biologics, macrolides and precision medicine in asthma management, it is logical to consider a paradigm shift in the treatment goals from asthma control to asthma remission** <https://bit.ly/3N9nEqN>

**Cite this article as:** Thomas D, McDonald VM, Pavord ID, *et al.* Asthma remission: what is it and how can it be achieved? *Eur Respir J* 2022; 60: 2102583 [DOI: 10.1183/13993003.02583-2021].

This single-page version can be shared freely online.

Copyright ©The authors 2022.

This version is distributed under the terms of the Creative Commons Attribution Non-Commercial Licence 4.0. For commercial reproduction rights and permissions contact [permissions@ersnet.org](mailto:permissions@ersnet.org)

Received: 28 Sept 2021  
Accepted: 17 March 2022

## Abstract

Asthma treatment goals currently focus on symptom and exacerbation control rather than remission. Remission is not identical to cure, but is a step closer. This review considers the current definitions of remission in asthma, the prevalence and predictors, the pathophysiology of remission, the possibility of achieving it using the available treatment options, and the future research directions. Asthma remission is characterised by a high level of disease control, including the absence of symptoms and exacerbations, and normalisation or optimisation of lung function with or without ongoing treatment. Even in those who develop a symptomatic remission of asthma, persistent pathological abnormalities are common, leading to a risk of subsequent relapse at any time. Complete remission requires normalisation or stabilisation of any underlying pathology in addition to symptomatic remission. Remission is possible as part of the natural history of asthma, and the prevalence of remission in the adult asthma population varies between 2% and 52%. The factors associated with remission include mild asthma, better lung function, better asthma control, younger age, early-onset asthma, shorter duration of asthma, milder bronchial hyperresponsiveness, fewer comorbidities and smoking cessation or never smoking. Although previous studies have not targeted treatment-induced remission, there is some evidence to show that the current long-term add-on therapies such as biologics and azithromycin can achieve some criteria for asthma remission on treatment, at least in a subgroup of patients. However, more research is required. Long-term remission could be included as a therapeutic goal in studies of asthma treatments.

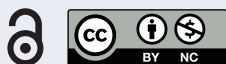

Supplement: inline-supplementary-material-1 [file inline-supplementary-material-1.pdf]
